# Supplementary material for: Phenylhydrazone-based endoplasmic reticulum proteostasis regulator compounds with enhanced biological activity
Source: eLife journal article supplement (doi:10.7554/elife.107000), 2025-07-17

Fig S5A. Total  $\gamma 2$

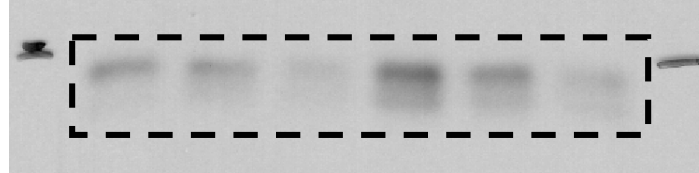

Fig S5A.  $\beta$ -actin

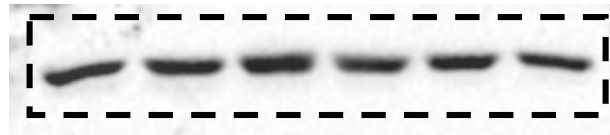

Original  $\beta$ -actin

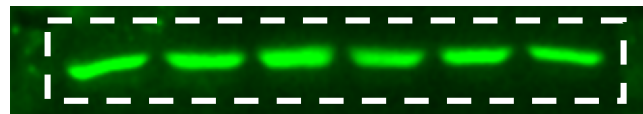

Figure S5B  
IB: BiP

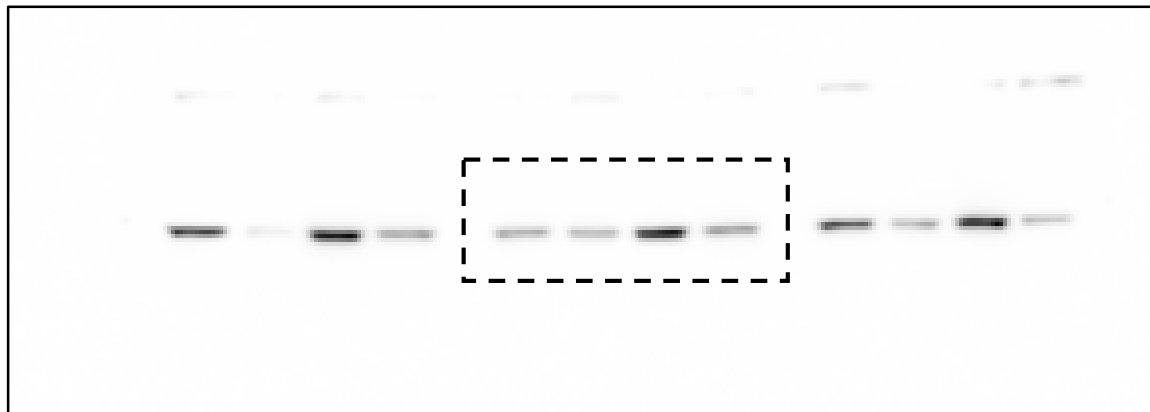

Figure S5B  
IB:  $\gamma_2$

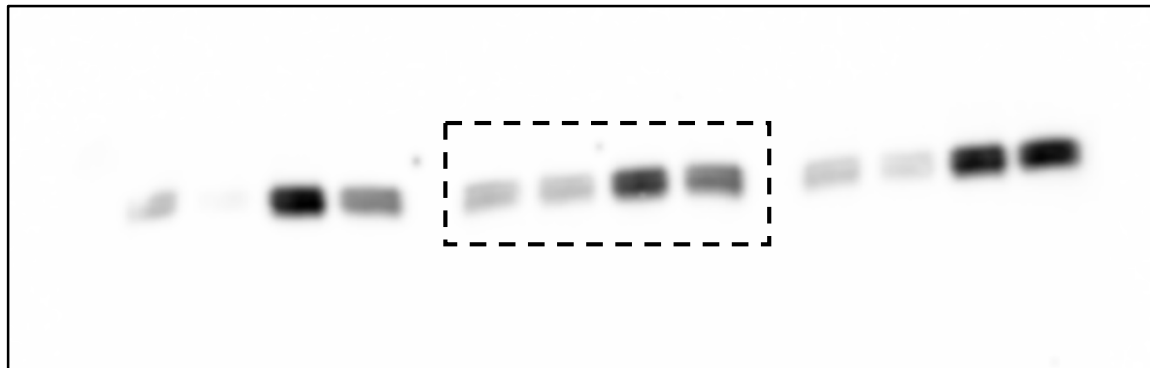

Figure S5B  
IB:  $\beta$ -actin

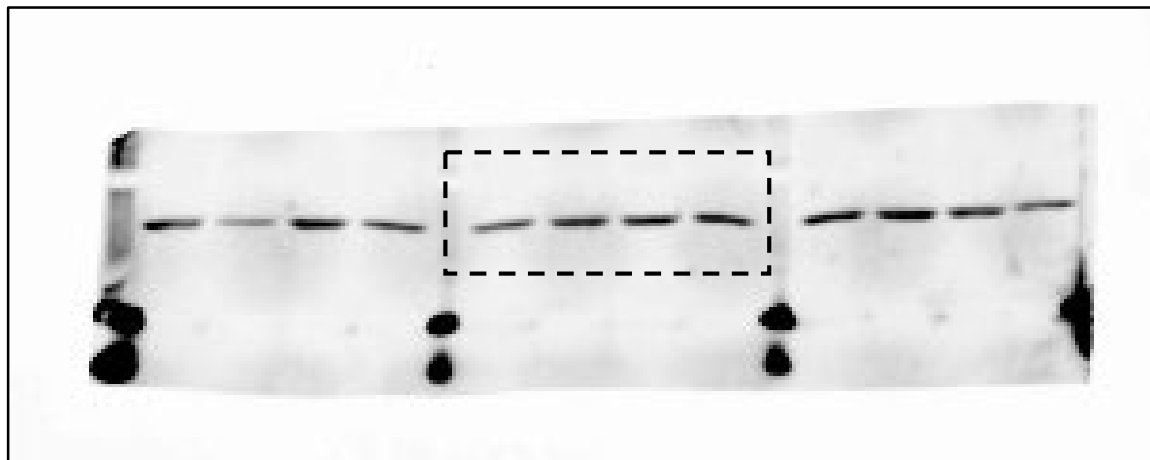

Fig S5C.  $\alpha 1\beta 2\gamma 2$ (WT) :  
Total  $\gamma 2$  expression

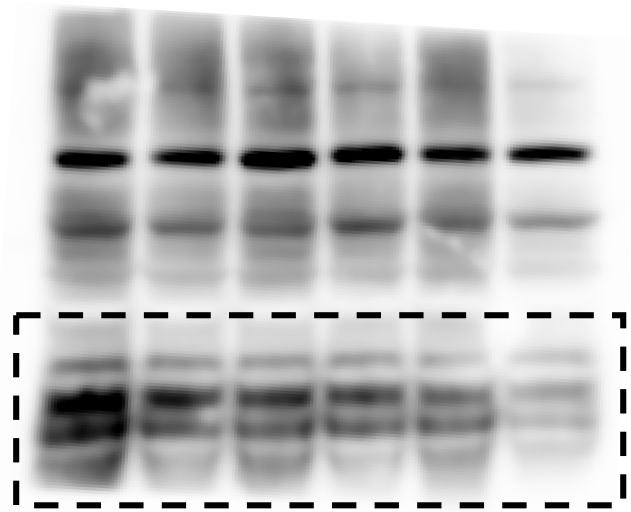

Fig S5C.  $\alpha 1\beta 2\gamma 2$ (R177G) :  
Total  $\gamma 2$  expression

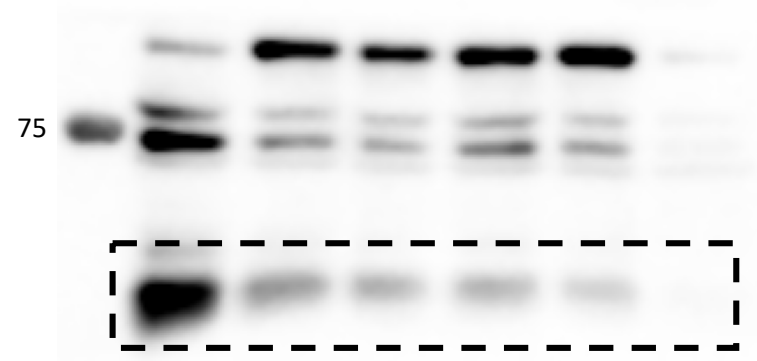

Fig S5C.  $\alpha 1\beta 2\gamma 2$ (R177G) + AA-263<sup>yne</sup> :  
Total  $\gamma 2$  expression

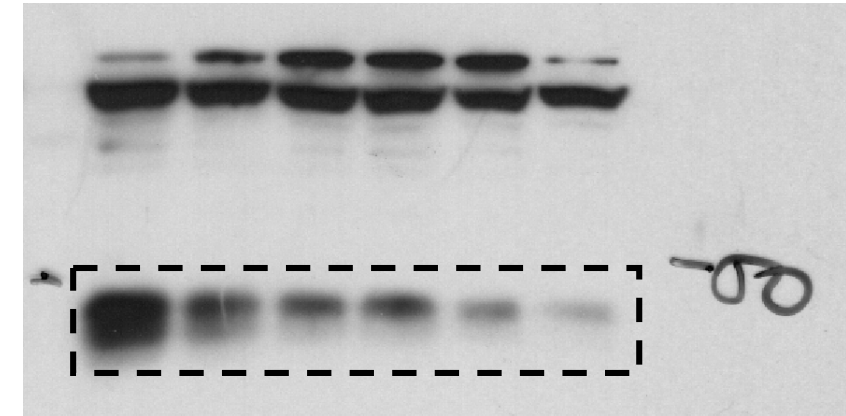

Fig S5C.  $\alpha 1\beta 2\gamma 2$ (WT) :  $\beta$ -actin

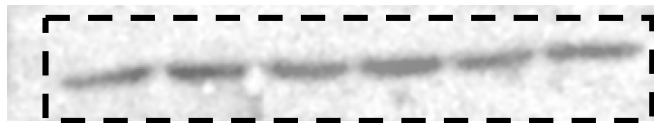

Original  $\beta$ -actin

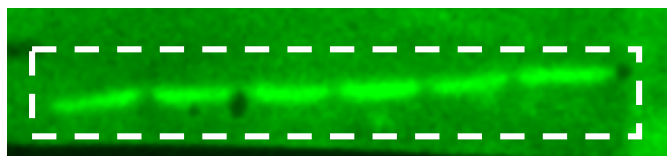

Fig S5C.  $\alpha 1\beta 2\gamma 2$ (R177G) :  $\beta$ -actin

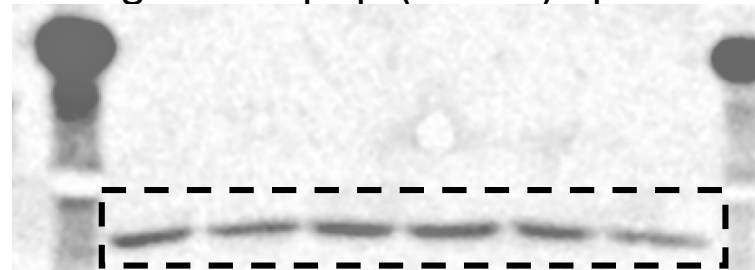

Original  $\beta$ -actin

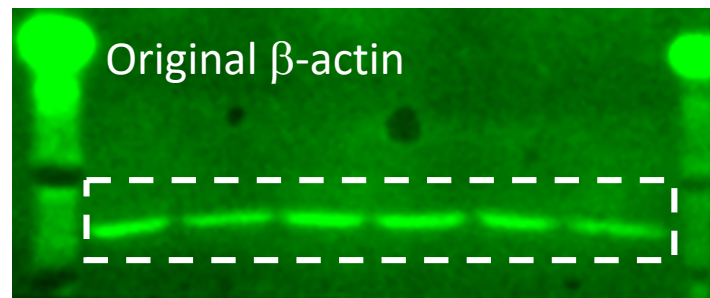

Fig S5C.  $\alpha 1\beta 2\gamma 2$ (R177G) + AA-263<sup>yne</sup> :  
 $\beta$ -actin

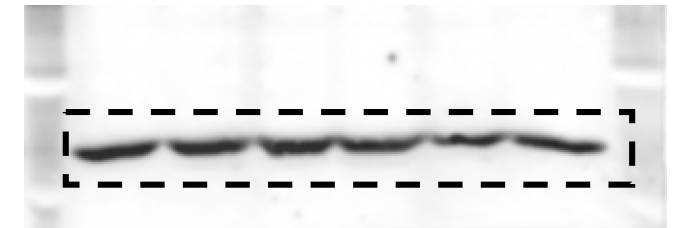

Original  $\beta$ -actin

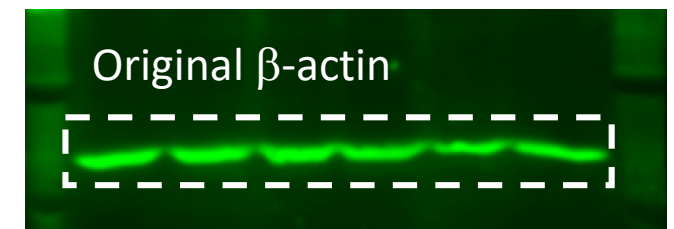

Fig S5D. Total  $\gamma$ 2

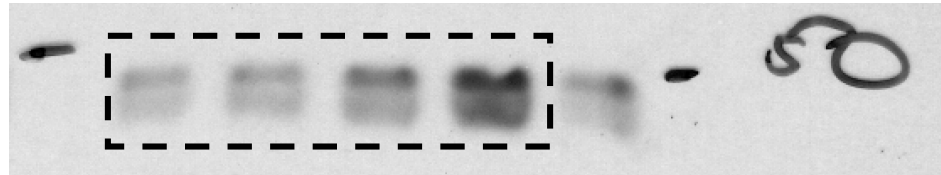

Fig S5D.  $\beta$ -actin

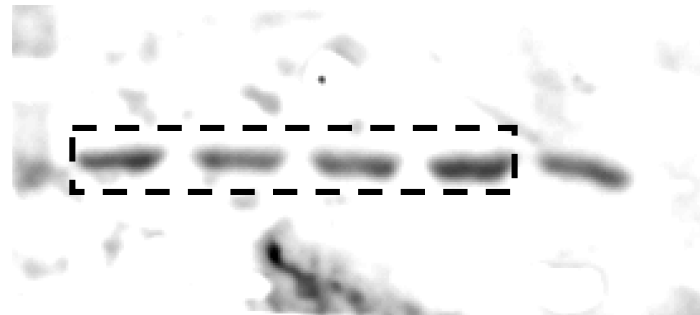

Original  $\beta$ -actin

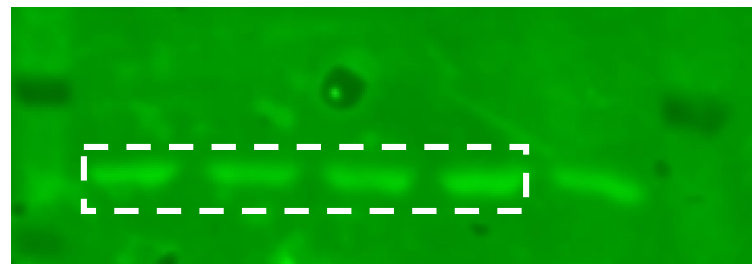

Supplement: fig5-figsupp1-data2 [file Figure 5 Figure supplement 1 source data 1.pdf › Figure 5 - figure supplement 1-source data 2/Figure 5 Figure supplement 1 source data 1.pdf]
