# Supplementary material for: Phenylhydrazone-based endoplasmic reticulum proteostasis regulator compounds with enhanced biological activity
Source: eLife journal article supplement (doi:10.7554/elife.107000), 2025-07-17
Supplement: fig1-data1 [file SourceDataFigure1.xlsx]

## Sheet: Figure 1B
V	V+BME55	V+BME110	Tg	Tg+BME	Tgbme1	263	263-BME55	263-BME110
1.05	1.04348	0.947368	12.9	12	5.18919	4.95652	5.56579	2.14773
0.45	0.782609	0.789474	7.2	5.80263	7.2973	5.68421	1.74419	2.07954
1.5	0.978261	0.828947	5.85	6.17647	6.44595	5.52632	4.26316	5.16279
1.95652	1.95	0.352941	5.54348	6	8.39189	5.44737	2.51163	3.58696
0.717391	0.9	0.411765	3.26087	5.02174	5.10811	4.94118	2.51163	3.71739
0.32		0.529412	3.06522	7.76087	5.82353	8.35294	4.58824	4.30435
1.22368
1.5
0.276316
1.76471
0.823529
0.411765

## Sheet: Figure 1C
Veh	Veh+Res	Tg	Tg+Res	263	263+Res
0.511364	1.05682	6.34091	5.59459	5.68421	1.94318
0.818182	0.681818	5.04545	6.16216	5.52632	3.10227
0.613636	1.90909	4.26136	6	5.44737	2.01136
1.125	0.732558	7.18605	3.96721	4.94118	2.30233
1.32954	0.523256	5.86046	5.63934	3.73256	2.33721
1.60227	1.63953	4.01163	5.34426	2.16279	1.88372
0.872093				4.90909
0.55814				2.14773
0.593023				2.07954
0.906977				5.16279
1.63953				2.51163
1.43023

## Sheet: Figure 1E
[AA263] µM	ERSE-FLuc Activity				[AA263yne] µM	ERSE-Fluc Activity
20	5.50929	4.19331	4.46097		20	4.17614	5.36932	6.30996
10	4.66171	4.37175	2.98885		10	3.87454	3.68182	3.54243
5	2.63197	1.96283	1.51673		5	5.44649	3.42614	4.31734
2.5	1.87361	1.67286	1.65056		2.5	2.72325	2.1476	2.16974
1.25	1.31598	1.22677	1.00372		1.25	1.35055	1.19557	1.30627
0.625	1.11524	0.892193	1.20446		0.625	1.90406	1.61624	2.0369
0.3125	1.51673	1.09294	1.47212		0.3125	1.04059	0.708487	0.907749
0.15625	1.69517	1.13755	1.3829		0.15625	1.90406	1.8155	1.66052

## Sheet: Figure 1F
Veh	V+BME55	Veh+Res	AA263yne	AA263yne + BME	AA263yne + Res
1.05	1.04348	1.05682	9.3	5.25	2.35
0.45	0.782609	0.681818	5.03289	5.1	3
1.5	0.978261	1.90909	5.08696	3.13043	2.78289
1.95652	1.95	0.732558	4.39344	3.71739	3.25658
0.717391	0.9	0.523256	7.95652	3.87454	1.87532
0.32		1.63953	4.85	3.55	3.64865
1.22368
1.5
0.276316
1.76471
0.823529
0.411765

## Sheet: Figure 1I
	AA263yne								AA132yne
P4HB	3.93099	3.68378	3.81897	3.70734	5.00838	4.44391	4.7348	4.39523	4.39523	8.8909	8.35852	10.862	11.2494	8.69569	6.41442
PDIA3	2.4766	2.35281	2.38166	2.27425	4.09384	3.75096	4.51134	3.96196	3.96196	3.98599	3.60119	5.59201	5.29425	4.90479	3.19068
PDIA4	3.77608	3.41787	3.57911	3.28219	6.86683	5.80341	6.36529	5.86718	5.86718	6.65406	6.27189	11.2528	11.5483	12.0005	7.78498
PDIA6	2.88499	2.76511	2.95028	2.79465	3.6981	3.55018	3.91448	3.32431	3.32431	3.90031	3.64073	12.3539	13.146	11.7461	8.50734
TMX1	1.81887	1.6536	1.72457	1.6306	2.63233	2.6859	2.99439	2.95739	2.95739	6.59087	6.0915	6.76663	6.92722	9.12367	8.13214
TXNDC5	3.20208	3.10007	3.14869	2.90097	3.8571	3.44129	4.4506	3.75218	3.75218	8.11014	7.2164	2.93258	2.54936	2.26805	4.20182
TXNDC12	4.44924	4.74357	4.95668	4.44404	2.55438	2.218	2.70789	2.45721	2.45721	4.16533	3.7562
