# Supplementary material for: Phenylhydrazone-based endoplasmic reticulum proteostasis regulator compounds with enhanced biological activity
Source: eLife journal article supplement (doi:10.7554/elife.107000), 2025-07-17
Supplement: fig1-figsupp1-data1 [file SourceDataFigureS1.xlsx]

## Sheet: Figure S1A
Veh	Tg	AA263	AA263-1
0.928349	7.81724	5.49948	1.87331
0.951194	8.07269	6.15161	2.08515
0.951194	8.32606	6.75597	2.1973
1.00311
1.02596
1.14019

## Sheet: Figure S1B
	Veh						Tg			AA263			AA263yne
Veh	1.48214	0.898204	1.20359	1.48214	1.375	0.857143	4.85714	7.125	8.42857	4.22156	6.32335	4.4359	5.47904	6.9521	5.73054
CP7	1.48214	0.898204	1.20359	1.48214	1.375	0.857143	2.32143	2.80357	2.33929	1.61677	1.88623	2.58683	1.25748	0.934132	0.97006
