# Supplementary material for: Phenylhydrazone-based endoplasmic reticulum proteostasis regulator compounds with enhanced biological activity
Source: eLife journal article supplement (doi:10.7554/elife.107000), 2025-07-17
Supplement: fig2-data1 [file SourceDataFigure2.xlsx]

## Sheet: Figure 2B
Veh	Tg	AA263	AA263-2	AA263-3	AA263-4	AA263-5	AA263-6	AA263-7	AA263-	AA263-9	AA263-10	AA263-11	AA263-12
0.686347	8.16974	4.66171	1.17264	2.29316	0.774194	2.28	3.68182	1.20574	1.35678	1.29438	1.23077	1.79357	0.467381
0.487085	8.81181	4.37175	1.38111	1.08795	0.662366	3.48	2.98296	1.14833	1.33417	1.2809	2.10526	1.25609	0.90555
1.06273	9.34317	2.98885	1.10749	1.90228	0.516129	3.06	2.4375	1.67656	1.78643	0.876404	1.09312	1.51899	0.613437
1.68266	7.57196				1.2043		3.88472		1.19326	1.35678	1.2043
1.23985	7.88192				1.95269		2.75871		1.14607	1.33417	1.95269
0.841328	8.24				1.16129		2.71046		1.59775	1.78643	1.16129
