# Supplementary material for: Phenylhydrazone-based endoplasmic reticulum proteostasis regulator compounds with enhanced biological activity
Source: eLife journal article supplement (doi:10.7554/elife.107000), 2025-07-17
Supplement: fig2-figsupp1-data1 [file SourceDataFigureS2.xlsx]

## Sheet: Figure S2A
HSPA5/BiP							DNAJB9/ERdj4							CHOP/DDIT3
Veh	Tg	AA263	AA263-2	AA263-5	AA263yne		Veh	Tg	AA263	AA263-2	AA263-5	AA263yne		Veh	Tg	AA263	AA263-2	AA263-5	AA263yne
0.791	15.541	2.42	0.677	2.336	2.62		1.11	7.967	1.457	1.376	1.265	1.596		1.026	26.361	2.681	3.26428	4.017	1.565
1	14.875	2.12	0.539	3.39	2.34		1	6.148	1.183	0.967	1.592	1.451		1	15.476	2.256	2.79624	4.861	1.289
1	12.126	2.087	0.71	4.073	2.60291		1.166	5.447	1.205	1.421	1.935	1.26404		1	24.228	4.027	3.70834	1.523	1.643
0.613														0.525

## Sheet: Figure S2B
[Compound]	AA263			AA263-5			AA263yne
20	5.50929	4.19331	4.46097	4.67292	4.33512	3.48257	4.17614	5.36932	6.30996
10	4.66171	4.37175	2.98885	3.88472	3.48	4.66171	3.88472	5.17722	3.35443
5	2.63197	1.96283	2.46835	2.28	3.48	3.06	5.44649	3.42614	4.31734
2.5	1.87361	1.67286	1.73418	1.59043	2.55556	2.25	2.72325	2.1476	2.16974
1.25	1.31598	1.22677	1.35443	1.36077	1.59043	1.61914	1.35055	1.19557	1.30627
0.625	1.11524	0.892193	1.20446	1.96364	1.01627	0.947368	1.90406	1.61624	2.0369
0.3125	1.51673	1.09294	1.47212	1.21723	0.901435	1.59043	1.04059	0.708487	0.907749
0.15625	1.69517	1.13755	1.3829	0.77512	0.98756	1.11962	1.90406	1.8155	1.66052
