# Supplementary material for: Phenylhydrazone-based endoplasmic reticulum proteostasis regulator compounds with enhanced biological activity
Source: eLife journal article supplement (doi:10.7554/elife.107000), 2025-07-17
Supplement: fig3-data1 [file SourceDataFigure3.xlsx]

## Sheet: Figure 3B
[Cpmd]	AA263			AA263yne			AA263-13			AA263-14			AA263-15			AA263-16			AA263-17			AA263-18			AA263-19			AA263-20
20	5.50929	4.19331	4.46097	4.17614	5.36932	6.30996	3.65217	3.93311	3.93311	4.86245	4.6171	4.2	13.18	8.42	7.36	1.18395	0.762542	0.90301	2.60804	2.90955	1.25126	2.18593	2.18593	4.74874	2.42857	2.07937	1.95429	7.31746	5.72571	8.33143
10	4.66171	4.37175	2.98885	3.87454	3.68182	3.54243	3.99331	3.51171	3.51171	5.19703	7.44981	11.14	13.32	14	9.78	0.842809	0.822742	1.12375	3.54271	3.90452	2.30653	4.71859	1.64322	3.93467	1.98413	1.19048	3.18857	9.22222	6.61714	9.80571
5	2.63197	1.96283	1.51673	5.44649	3.42614	4.31734	4.87625	3.69231	3.69231	4.48327	5.59851	7.9	12.86	12.32	8.34	1.32441	0.682274	0.301003	3.48241	4.80905	1.34171	2.75879	2.45729	2.60804	1.8254	2.30159	1.71429	5.60318	4.76571	6.68571
2.5	1.87361	1.67286	1.65056	2.72325	2.1476	2.16974	3.61204	4.41472	2.14716	4.70632	3.50186	5.4	6.26	8.36	5.44	1.36455	0.882943	1.52508	1.94472	2.00502	0.979899	2.36683	2.06533	2.21608	1.73016	2.33333	2.29714	1.95238	2.74286	2.53714
1.25	1.31598	1.22677	1.00372	1.35055	1.19557	1.30627	2.24749	2.7291	2.44816	1.98513	2.07435	3.32	3.9	3.6	2.62	1.70569	0.722408	0.561873	2.60804	2.06533	1.0402	2.21608	2.12563	2.30653	1.76191	0.047619	1.57714	2.61905	1.50857	2.64
0.625	1.11524	0.892193	1.20446	1.90406	1.61624	2.0369	1.82609	2.36789	1.44482	1.4052	1.98513	2.08	2.02	2.08	1.94	1.32441	0.541806	0.58194	1.58292	1.28141	0.708543	1.85427	1.1005	1.64322	1.12698	1.03175	1.30286	1.88889	2.74286	2.43429
0.3125	1.51673	1.09294	1.47212	1.04059	0.708487	0.907749	1.50502	1.10368	1.78595	1.56134	1.13755	1.58	2.26	1.8	1.84	0.842809	0.983278	0.381271	1.25126	0.949749	1.25126	1.58292	0.648241	1.19095	1.4127	0.52381	1.30286	1.22222	1.02857	1.40571
0.15625	1.69517	1.13755	1.3829	1.90406	1.8155	1.66052	0.983278	2.04682	1.20401	1.3829	1.71747	1.24	1.36	2.02	1.34	0.842809	0.742475	2.40803	1.13065	1.79397	1.49246	1.37186	1.49246	0.859296	0.936508	1.15873	1.23429	1.73016	1.30286	1.78286

## Sheet: Figure 3C
[cmpd]]	AA263			AA263yne			AA263-15			AA263-20
20	5.50929	4.19331	4.46097	4.17614	5.36932	6.30996	13.18	8.42	7.36	7.31746	5.72571	8.33143
10	4.66171	4.37175	2.98885	3.87454	3.68182	3.54243	13.32	14	9.78	9.22222	6.61714	9.80571
5	2.63197	1.96283	1.51673	5.44649	3.42614	4.31734	12.86	12.32	8.34	5.60318	4.76571	6.68571
2.5	1.87361	1.67286	1.65056	2.72325	2.1476	2.16974	6.26	8.36	5.44	1.95238	2.74286	2.53714
1.25	1.31598	1.22677	1.00372	1.35055	1.19557	1.30627	3.9	3.6	2.62	2.61905	1.50857	2.64
0.625	1.11524	0.892193	1.20446	1.90406	1.61624	2.0369	2.02	2.08	1.94	1.88889	2.74286	2.43429
0.3125	1.51673	1.09294	1.47212	1.04059	0.708487	0.907749	2.26	1.8	1.84	1.22222	1.02857	1.40571
0.15625	1.69517	1.13755	1.3829	1.90406	1.8155	1.66052	1.36	2.02	1.34	1.73016	1.30286	1.78286

## Sheet: Figure 3D
Veh	263yne	263-15	263-20
0.791	2.62	8.856	3.761
1	2.34	5.003	3.684
1	2.60291	3.111	4.893
