# Supplementary material for: Phenylhydrazone-based endoplasmic reticulum proteostasis regulator compounds with enhanced biological activity
Source: eLife journal article supplement (doi:10.7554/elife.107000), 2025-07-17
Supplement: fig3-figsupp1-data1 [file SourceDataFigureS3.xlsx]

## Sheet: Figure S3A
ERDJ4/DNAJB9					CHOP/DDIT3
Veh	AA263-yne	AA263-15	AA263-20		Veh	263-5	263-5-3	263-5-8
1.11	1.596	3.861	1.89		1.026	4.295	5.438	1.714
1	1.451	2.224	1.664		1	1.289	1.772	1.408
1.166	1.26404	1.013	2.029		1	1.643	2.99	1.774
					0.525
