# Supplementary material for: Phenylhydrazone-based endoplasmic reticulum proteostasis regulator compounds with enhanced biological activity
Source: eLife journal article supplement (doi:10.7554/elife.107000), 2025-07-17
Supplement: fig4-data1 [file SourceDataFigure4.xlsx]

## Sheet: Figure 4A
Veh	AA263	AA263yne	AA263-20
0.97	0.717	0.568	0.48
0.922	0.592	0.482	0.491
1.15	0.736	0.595	0.501
1	0.605	0.613	0.595
1.136	0.66	0.486	0.488
0.896
1.012
0.956
1.039
0.919
1.077
0.989
1.167
0.959
1.104
1.052
1.151
1.111
0.678
0.713

## Sheet: Figure 4B
Veh	AA263	AA263yne	AA263-20
1.093	0.586	0.642	0.81
0.934	0.557	0.521	0.683
1.189	0.489	0.627	0.833
1.011	0.497	0.571	0.794
0.948	0.458	0.532	0.75
0.828
0.95
1.009
0.972
1.064
1.317
1.024
1.108
1.107
1.144
0.948
0.964
0.943
0.687
0.758

## Sheet: Figure 4C
Veh	AA263	AA263yne	AA263-20
0.812	0.951	2.353	2.195
0.626	0.878	2.224	2.245
0.782	0.69	2.346	2.31
1.016	0.896	2.442	2.468
1.5	1.47	2.858	3.036
1.285
1.319
0.775
0.757
1.128
0.93
0.709
1.007
1.259
2.093
1.183
0.779
0.65
0.532
0.857
