# Supplementary material for: Phenylhydrazone-based endoplasmic reticulum proteostasis regulator compounds with enhanced biological activity
Source: eLife journal article supplement (doi:10.7554/elife.107000), 2025-07-17
Supplement: fig4-figsupp1-data1 [file SourceDataFigureS4.xlsx]

## Sheet: Figure S4
Veh	AA263	AA263yne	AA263-20
1.66	2.465	2.631	5.036
1	2.226	2.714	3.961
0.973	2.09	2.415	4.445
