# Supplementary material for: Phenylhydrazone-based endoplasmic reticulum proteostasis regulator compounds with enhanced biological activity
Source: eLife journal article supplement (doi:10.7554/elife.107000), 2025-07-17
Supplement: fig5-data1 [file SourceDataFigure5.xlsx]

## Sheet: Figure 5A
DMSO	AA263yne	AA263-5
100	129.194	83.5994
100	175.33	122.911
100	117.059	131.272
100	244.984	120.654
100	121.446	84.2297

## Sheet: Figure 5B
DMSO	AA263-14	AA263-15	AA263-20
100	209.107	120.229	121.617
100	465.248	371.609	612.693
100		229.134	232.551
100	364.32	206.598	261.136
100	213.337	317.989	376.772

## Sheet: Figure 5D
WT	g2(R177G)	g2(R177G) + AA263yne	g2(R177G) + AA263-20
556.1	85.8	1893.3	852.5
323.83	333.2	645.1	2893.4
849.5	359.7	1628.1	1300.4
529.7	140.4	1984.4	1823.5
1300	12.8	1050.2	1406.8
493.3	35.3	4397.5	752.1
4676.7	108	2477	4093.4
2511.6	74	6226.8	4109.4
1200.6	210.2	2454.8	4841.2
1571	679.6	1594.2	2342
1942.3	946.6	1090.1	2004.8
2690.8	998
4205	1007.8
2360.7

## Sheet: Figure 5E
WT	g2(R177G)	g2(R177G) + AA263yne	g2(R177G) + AA263-20
47.1271	8.53731	119.981	42.9039
24.7956	27.0454	48.6134	219.696
50.4454	19.9944	124.282	155.55
46.101	13.2578	219.513	119.967
65.3266	1.47296	65.9259	110.078
40.9378	3.05893	358.687	68.4973
218.231	10.0279	190.832	197.653
119.146	4.63369	565.559	156.787
96.7446	22.9978	185.829	248.012
133.136	25.8305	88.8629	201.376
152.457	88.7993	49.55	174.179
291.528	90.4805
466.704	53.2664
159.939
