# Supplementary material for: Phenylhydrazone-based endoplasmic reticulum proteostasis regulator compounds with enhanced biological activity
Source: eLife journal article supplement (doi:10.7554/elife.107000), 2025-07-17
Supplement: fig5-figsupp1-data1 [file SourceDataFigureS5.xlsx]

## Sheet: Figure S5A
DMSO	AA263yne	AA263-5
100	337.649	368.088
100	127.664	196.434
100	386.688	310.539
100	385.297	200.045
100	394.65	324.629

## Sheet: Figure S5B
Gamma2					BiP
Veh	CP7	AA263yne	AA263yne+CP7		Veh	CP7	AA263yne	AA263yne+CP7
0.115225	0.029802	0.494348	0.360625		0.314409	0.077666	0.404464	0.203461
0.14458	0.140026	0.397014	0.31838		0.190285	0.182302	0.40573	0.221683
0.075585	0.059395	0.393979	0.471041		0.281156	0.111602	0.382869	0.224373
0.092612	0.125403	0.426406	0.355579		0.283763	0.079462	0.422498	0.214276
0.118048	0.140112	0.404862	0.336978		0.157488	0.253212	0.184232	0.405068
0.096875	0.134359	0.50701	0.261756		0.201556	0.240125	0.440391	0.117928

## Sheet: Figure 5D
DMSO	AA263-14	AA263-15	AA263-20
100	174.164	227.069	315.84
100	117.486	229.055	321.931
100	340.158	204.991	490.391
100	124.714	176.912	199.218
