# Supplementary figures and images for: Phenylhydrazone-based endoplasmic reticulum proteostasis regulator compounds with enhanced biological activity
Source: eLife journal article supplement (doi:10.7554/elife.107000), 2025-07-17

Fig 5A. Surface  $\gamma 2$

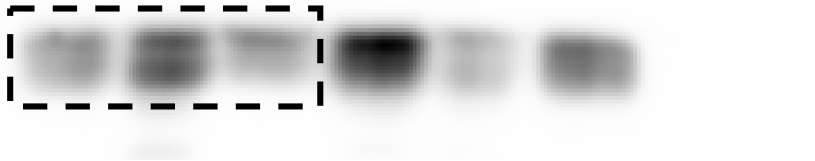

Fig 5A.  $\text{Na}^+/\text{K}^+$  ATPase

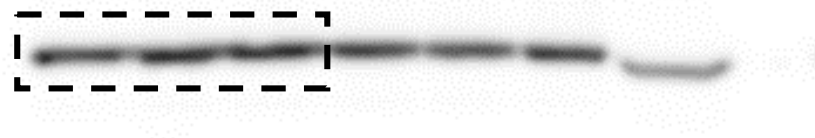

Fig 5B. Surface  $\gamma 2$

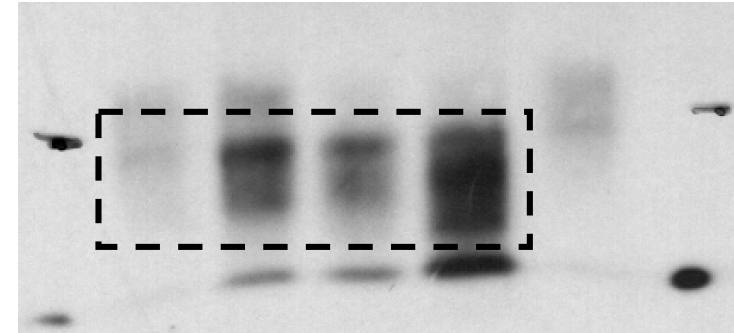

Fig 5B.  $\text{Na}^+/\text{K}^+$  ATPase

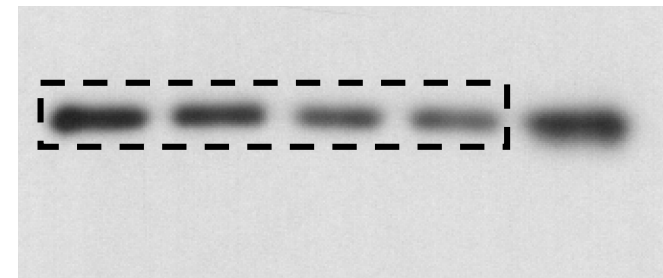

Supplement: fig5-data2 [file Figure 5 Source data 1.pdf › Figure 5 - source data 2/Figure 5 Source data 1.pdf]
